# Supplementary material
Source: PubMed Central journal article supplement (PMC3429559)
Supplement: auto-8-1159-s01.pdf [file auto-8-1159-s01.pdf]

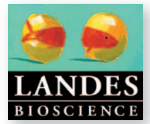

## **Supplemental Material to:**

**Jason S. King**

**Autophagy across the eukaryotes:  
Is *S. cerevisiae* the odd one out?**

**Autophagy 2012; 8(7)**

**<http://dx.doi.org/10.4161/auto.20527>**

**[www.landesbioscience.com/journals/autophagy/article/20527](http://www.landesbioscience.com/journals/autophagy/article/20527)**



```

                20                                40                                60
C. elegans      - - - - - MVKFQI I ARDFYHGF I DSFKG - - - - - I TF VRR I REEE AKEVK
T. thermophila - - - - - MEFVYKS I IFLFI CGL QDSFR - - - - - I YPI KRYI V TSHR
T. brucei      - - - - - MSSGVPVSS QWPP V RGL I I LRAAF SGARQS - - - - - LDVVKF LSYVGS S
A. thaliana   - - - - - MRSKSKQV L LLLWLEGF REACS - - - - - LHRVVI L CLR SRK
D. discoideum MET FKEYVTKRI DNTI P QVKEMFKLI WLGVADSMK - - - - - LKGAI I RTI KSEV
N. gruberi    - - - - - MPNL SAMFANLTK GLR DGMN - - - - - FPF AI E I FAKSKT
P. sojae      - - - - - MSDTF SAGFREFCGV QHAVS - - - - - LHR I L LFY I K SRL
H. sapiens    - - - - - MADSV KTF L QDLAR GI KDS I WGI CTI SKLDARI QKKREE QR RRR ASSV LA QRRAQS I ERKQ

                80                                100                                120                                140
C. elegans      VEPPKPVERT V LMMRREK QGI FKR PPE PPKKDS F LK K I WQI YAMNI GF L - - - - - VLWQVC I L I LGL FFF SFF
T. thermophila - - - - - NSQTFK I L GQS F I H - LFI YFI LSI V MNL LSN - - - - - S ALF QK LKELS QV
T. brucei      - - - - - AEVSRNLR SCTLVNF LFFF G I W I S S I V F S P L W S L A V T LMRGR S T LAGDP DAI TNSAS LSNVNRVAGGATGV
A. thaliana   - - - - - LLRTGQCF LLNGL I FLGSLGV FKF I DP S L QW I L P DQCS - - - - - PLTSQEFCSYGGFYAF L
D. discoideum - - - - - LRKNFIH CI FLNGI I FLGTYLI YLWV S P M L N L L N - - - - - HFP T LSNMFT - -
N. gruberi    - - - - - LKPLFVQCF I L NGL F L V G S I I F F D Y I A A P L F D S A - - - - - S S S S G A L N N I N D N S - -
P. sojae      - - - - - I C V S V K C F V L N G L I F L G S I Y F F D R A V I P V I H L F G E V L H R - - - - - S F S D G S V G Q V D D V R D R V
H. sapiens    ESEPR I VSR I F QCCAWNGG V E W F S L L F L F R V F I P V L Q S W T A R - - - - - I I G D P S L H G D V W S W L

                160                                180                                200                                220
C. elegans      DR TDLGHNI GY I L I I P I F F A S R I I Q A L W F S D I S G A C M R A L K L P P P - - - - -
T. thermophila A E T I F F V L Y Y V L W L G P L Y L I T T I Y T F F W F G D I A N L A F E I E R D H Y R V K - - - - - I V Q A K Q
T. brucei      V T I L W T C V F Y F W F P M Y G I T L L F G I R W N A L Y A A N S E K R R R A L L M A A A R S P G R P V V P V R G A A A G A G P K P T A S S
A. thaliana   R G G L L - Q L F Y W F W F P M Y L S F I L S N I W Y N D I A K H G F A I E I S D L N S A E A L R Q G E A L A S L N - - - - - M A N A E R P
D. discoideum - - - - - I L Y F S L W V Y P Y I F S I I A N S K W Y T E I A K E S E V I S G R T T F A N - - - - -
N. gruberi    - - - - - M D L F W I W P L Y T I S F I L S A S W Y D G I A E H A K K L S L H T R - - - - -
P. sojae      D G F V F - L L Y Q V L W M Y P I Y C I S F I L N T I W Y Q E I A D D A Y M Q L H G K P - - - - -
H. sapiens    E F F L T - S I F S A L W V L P L F V L S K V V N A I W E Q D I A D L A F E Y S G R K P H - - - - -

                240                                260                                280                                300
C. elegans      - P V P P F S S M L A G T L I S A L H Q I F F L I Q G M L S Q Y L P I P I T P V I V Y L H M A L L N S M Y C F D Y F F D G Y N - - - - -
T. thermophila S I E T M G A N A L K K I V F M I V Y M I L S I S A G I F L G M I P Y I G K - - I L I M L Y S F Y Y S L F L F M L K W N Y N P - - - - -
T. brucei      L S F S D V V V S L T E T L F K V V A T S L C T V V M T V V G T I L P M P L G A C V D V A M R S W L H A F Y V F D Y R V S S Q Y V T D R V T Q R R N Y
A. thaliana   S G L G G V M I G I G E Q V Y S I L L L T F F F L E V C V V G V I P Y I G K - - I L N F L L L S W M Y A Y C Y E Y K W N F S G - - - - -
D. discoideum - S T N G I L S S F V D E I Y R N L L F G V I L V M S A I I A F I P Y T N - - F I N F V I I T W L Y S F W C F D Y K W I R G K - - - - -
N. gruberi    N T N T N S L D F R S D L I Y R P I I F L V F V T Q A S L L S L I P M V G T - - V A G F V L Y S W L Y A F Y A F E Y V W S Y K G - - - - -
P. sojae      - S P T P V T D M I R D E M Y R A I L V A F F L Q T V L S Y L I P V V G P - - A T S F I H L S W L Y S L Y C F E Y K W S L A G - - - - -
H. sapiens    - P F P S V S K I I A D M L F N L L L Q A L F L I Q G M F V S L F P I H L V G Q L V S L L H M S L L Y S L Y C F E Y R W F N K G - - - - -

                320                                340                                360
C. elegans      L S F L R R K D I F E S H W P Y F L G F G T P L A L A C S I S S N M F V N S V I F A L L P F F I I T S Y P A N W N R K Y E E E I P - - - K I A F C R
T. thermophila - - - Y I L S Y F E Q Y A A Y F L G F G L M Y S W F T N L F T - G A L N D G M Y W I L F P I Y I F N S T C T Q P P Y L K D L E I K S F S Q L K D L I
T. brucei      V G L S S A I E F F E A N W A Y F L G F G A S R C L V T G V L D L T G I V T S W E A K E A A V S V L F G A H V V L S V E A K L P P R A P F S I P M F T
A. thaliana   I S L K R L D F F Q S N W A F F A G F G S P C V L A I F F L S - P L V S G A L M A I L F P L F V L T A T G S G P E K L I G A P - - - R R T W K C A G
D. discoideum W N L L Q R I Q Y F E T H W A Y M F G Y G L I F T T C S F F F P - M L V G N A I F S I L Y P L F I I L S I S A K P T K M V N Q D G I L P K Q I P I F Y
N. gruberi    Y S L K K R I K Y F E E R W G Y M L A F G A P N A L I S N Y F P - F F L S G V W A M I F P I V S L L K F N Y - - - - -
P. sojae      W S L E R R L A H L E Q N W A Y F A G F G S P F T L A T F V P - N F V S K G I F A L L F P V F L L A I A C D P V S E G N E A - - - Q R K L P I F R
H. sapiens    I E M H Q R L S N I E R N W P Y Y F G F G L P L A F L T A M Q S S Y I I S G C L E S I L F P L F I I S A N E A K T P G K A Y L F Q L R L F S L V V F L

                380                                400                                420                                440
C. elegans      I S Y M F T E L V G K F V K S I T P T N N P - - - - -
T. thermophila Q G K N Y Q R S N V S Y D E H L K Q L R D D P Q Y K K Q C L K Q G S I F Q I V R K L T N K I N D I I G K Y L I Q Q T M N E S P D S Q S S Q I S T N
T. brucei      P F F I L C D K T I R A V V H V A Q - - - - -
A. thaliana   L G - - - K L P I F Y I A D T L S M L A L S - - - - -
D. discoideum V P E I I V N V I L K L Y V K Y K N T R G A - - - - -
N. gruberi    - - - - -
P. sojae      F S R W W S L Q L L R R V G K A T G L K T K - - - - -
H. sapiens    S N R L F H K T V Y L Q S A L S S S T S A E - - - - - K Q R I M E K Q K R T K R S - - - - - K F P S P H P S P A K L K A T A G H

```

## King Supplementary Figure 2

**Supplementary Figure 1.** Alignment of VMP1 proteins across the eukaryotic tree.

Orthologs from each of the representative species were aligned using the Clustal algorithm. Amino acids with conserved identity or charge are highlighted. Genbank Accession numbers of each protein are as follows: T.b. CBH17802, D.d. XP\_638348, C.e. NP\_499688, H.s. CAB66646, A.t. NP\_974552, T.t. XP\_001019558, P.s. EGZ29482.

**Supplementary Figure 2.** Alignment of EI24 proteins across the eukaryotes.

Orthologs from each of the representative species were aligned using the Clustal algorithm. Amino acids with conserved identity or charge are highlighted. Accession numbers of each protein are as follows: C.e. NP\_498575, T.t. XP\_001029863, T.b. XP\_843973, A.t. NP\_849325, D.d. XP\_638676, N.g. XP\_002677290, P.s. EGZ28405, H.s. NP\_004870.
